# Supplementary material
Source: Springer Nature journal article supplement (https://www.springermedizin.de/resource/supplementary/13075_2013_4182_MOESM6_ESM.pdf/9696288)

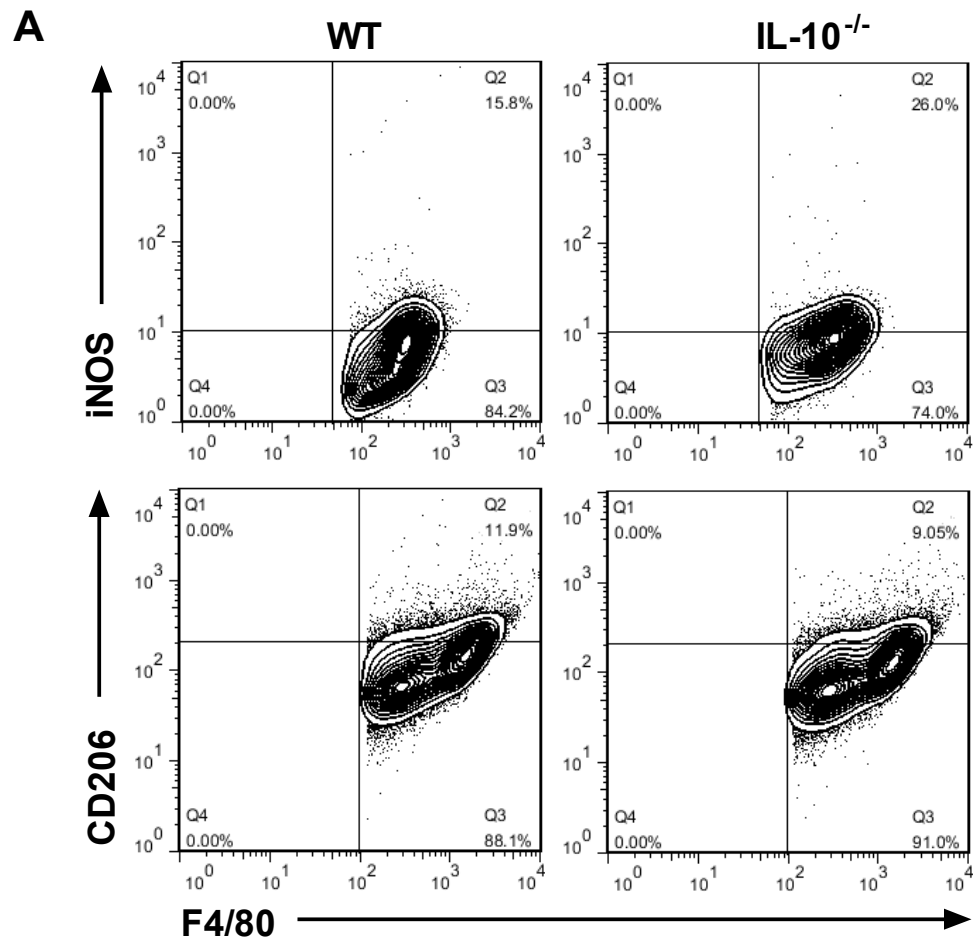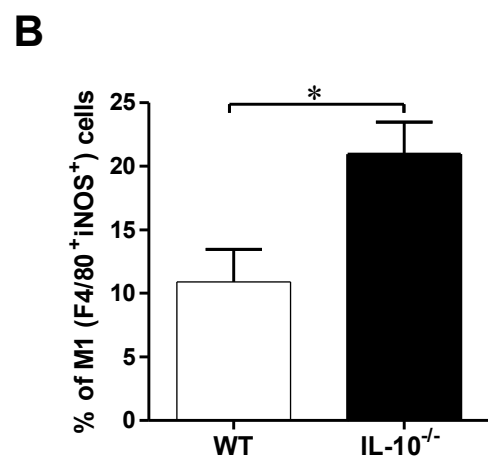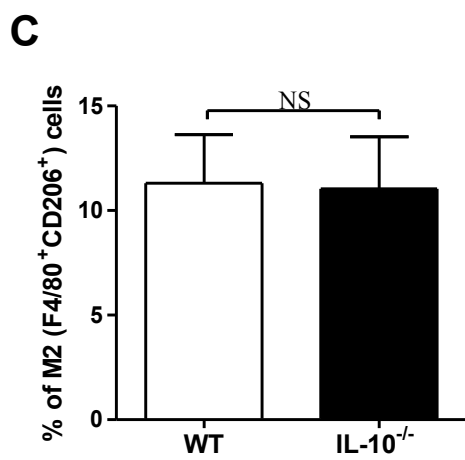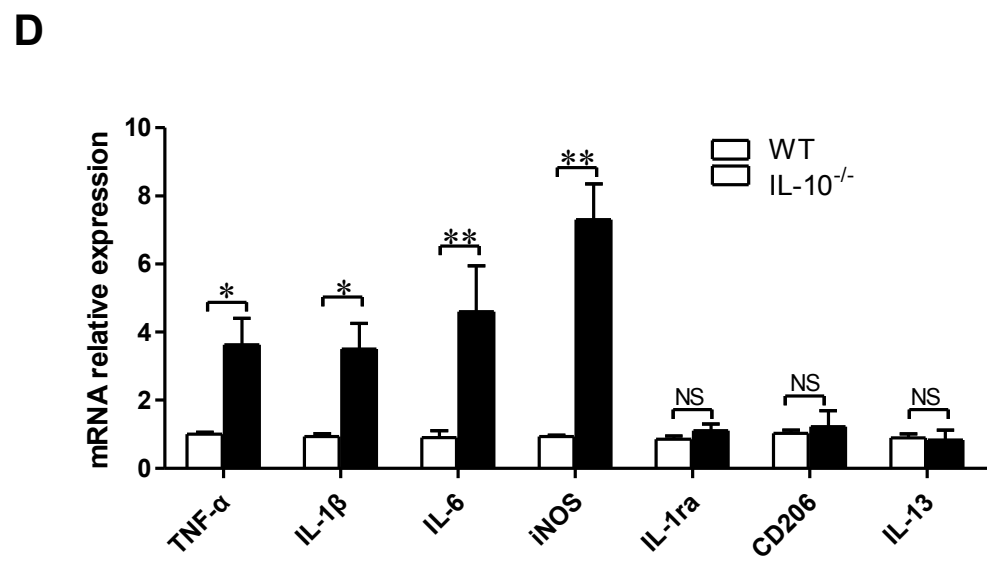

Supplement: MOESM6 [file 9696288]
